# Supplementary material for: Cytotoxicity of trifluridine correlates with the thymidine kinase 1 expression level
Source: PubMed Central journal article supplement (PMC6538667; doi:10.1038/s41598-019-44399-6), 2019-05-28
Supplement: 41598_2019_44399_MOESM1_ESM.pdf [file 41598_2019_44399_MOESM1_ESM.pdf]

## Supplementary information for

### Cytotoxicity of trifluridine correlates with the thymidine kinase 1 expression level

Yuki Kataoka<sup>1,2</sup>, Makoto Iimori<sup>1\*</sup>, Shinichiro Niimi<sup>3</sup>, Hiroshi Tsukihara<sup>4</sup>, Takeshi Wakasa<sup>1,4</sup>, Hiroshi Saeki<sup>5</sup>, Eiji Oki<sup>6</sup>, Yoshihiko Maehara<sup>5,6</sup> and Hiroyuki Kitao<sup>1,3</sup>

1: Department of Molecular Cancer Biology, Graduate School of Pharmaceutical Sciences, Kyushu University,  
3-1-1 Maidashi, Higashi-ku, Fukuoka, 812-8582, Japan.

2: Drug Discovery & Development I Laboratory, Taiho Pharmaceutical Co. Ltd., Japan.  
3, Okubo, Tsukuba, Ibaraki, 300-2611, Japan.

3: Innovative Anticancer Strategy for Therapeutics and Diagnosis Group, Innovative Center for Medical Redox Navigation, Kyushu University, Japan.  
3-1-1 Maidashi, Higashi-ku, Fukuoka, 812-8582, Japan.

4: Translational Research Laboratory, Taiho Pharmaceutical Co., Ltd.,  
224-2, Ebisuno Hiraishi, Kawauchi-Cho, Tokushima, 771-0194, Japan.

5: Department of Surgery and Science, Graduate School of Medical Sciences, Kyushu University, Japan.  
3-1-1 Maidashi, Higashi-ku, Fukuoka, 812-8582, Japan.

6: Kyushu Central Hospital of the Mutual Aid Association of Public School Teachers, 3-23-1 Shiobaru, Minami-ku, Fukuoka, 815-8588, Japan.

\*Corresponding author: Makoto Iimori

Phone/FAX: +81-92-642-6499; E-mail: iimori@surg2.med.kyushu-u.ac.jp

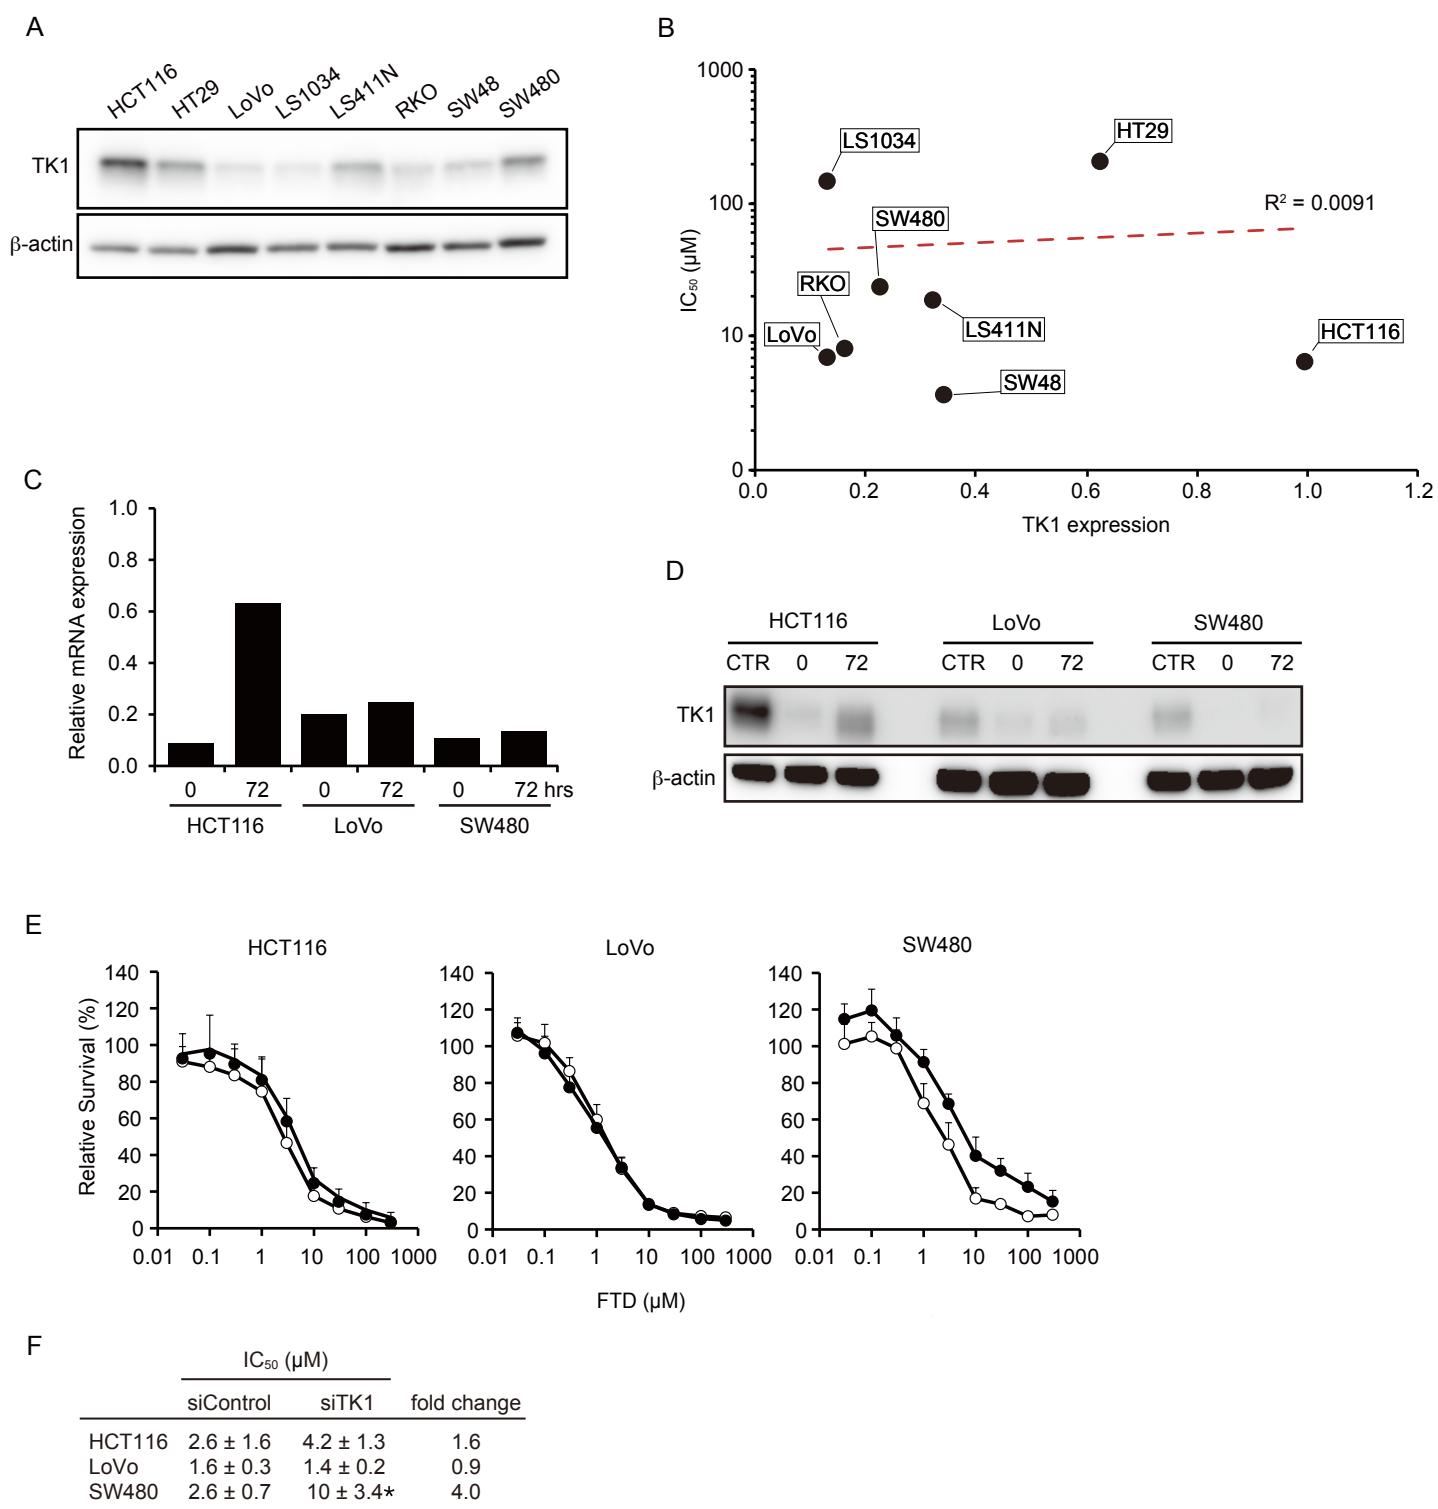

### Supplementary figure 1. FTD cytotoxicity in TK1-knock-down colorectal cancer cells.

(A,B) Colorectal cancer cell lines were immunoblotted with the indicated antibody. Correlation analysis between FTD cytotoxicity and the TK1 expression level in A. (C,D) Cells were transfected with *TK1*-targeting siRNA. At 48 and 120 h after transfection, which are indicated as 0 and 72 h, respectively, cells were harvested and the mRNA (C) and protein (D) levels of TK1 were measured. (E) Influence of *TK1* knock-down on cytotoxicity of FTD. At 48 h after transfection with control (open circles) or *TK1*-targeting (closed circles) siRNA, cells were treated with FTD for 72 h and their viability was determined. All data are expressed as means ± s.d. (F) Summary of the IC<sub>50</sub> values in each cell line in (E).

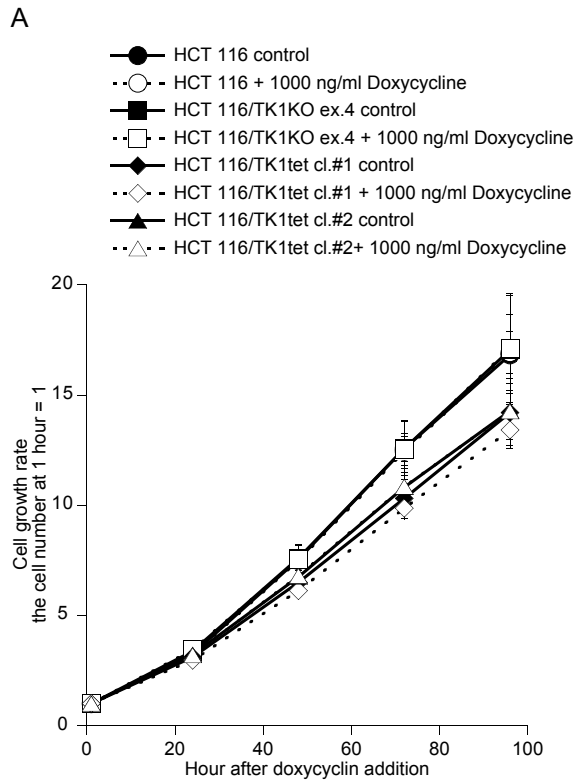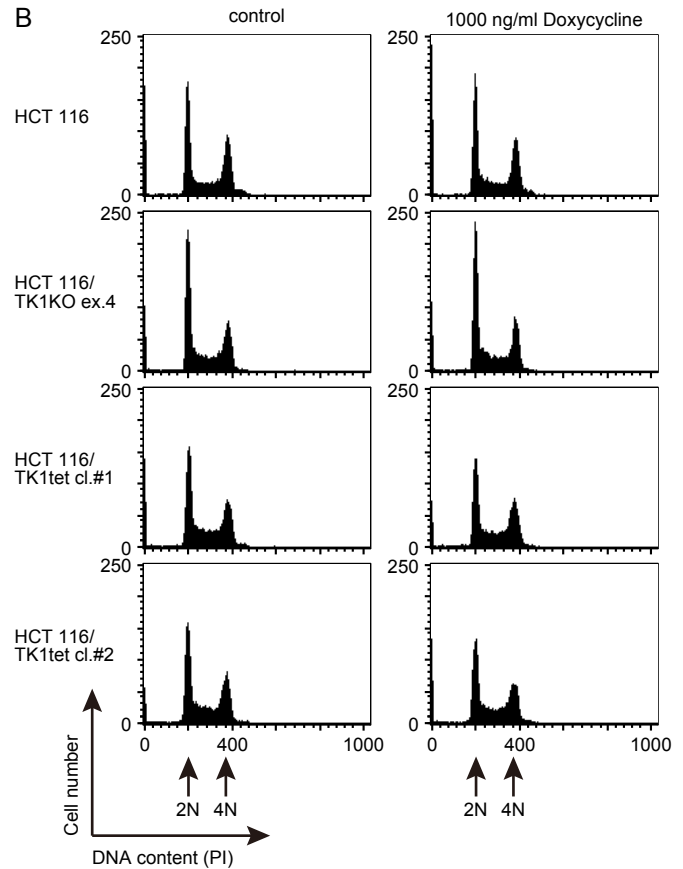

**Supplementary figure 2. Cell growth rates and cell cycle distributions.**

(A) Growth curve of each cell line treated with 0 or 1000 ng/ml doxycycline. Cell viability was evaluated at 1, 24, 48, 72 and 96 h after plating, and the cell growth rate relative to that at 1 h was calculated. (B) Cell cycle distribution. Cells were treated with 0 or 1000 ng/ml doxycycline for 1 day, fixed and stained with propidium iodide. The DNA content was quantitated using a FACSCalibur instrument.

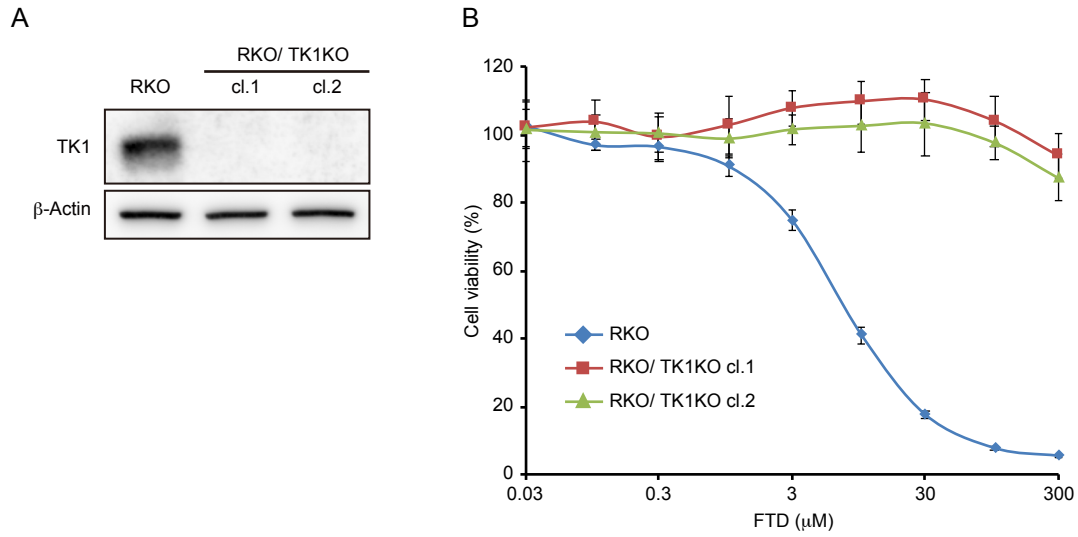

**Supplementary figure 3. FTD cytotoxicity in *TK1*-knock-out RKO cells.**

(A) Western blot analysis of TK1 protein in RKO parental and *TK1*-knock-out cells. (B) Cell viability assay. Cells were treated with nine points of dilution series of FTD for 3 days and then their viability was determined. The viability of cells not treated with FTD was defined as 100%. Data are means  $\pm$  s.d. of three independent experiments.

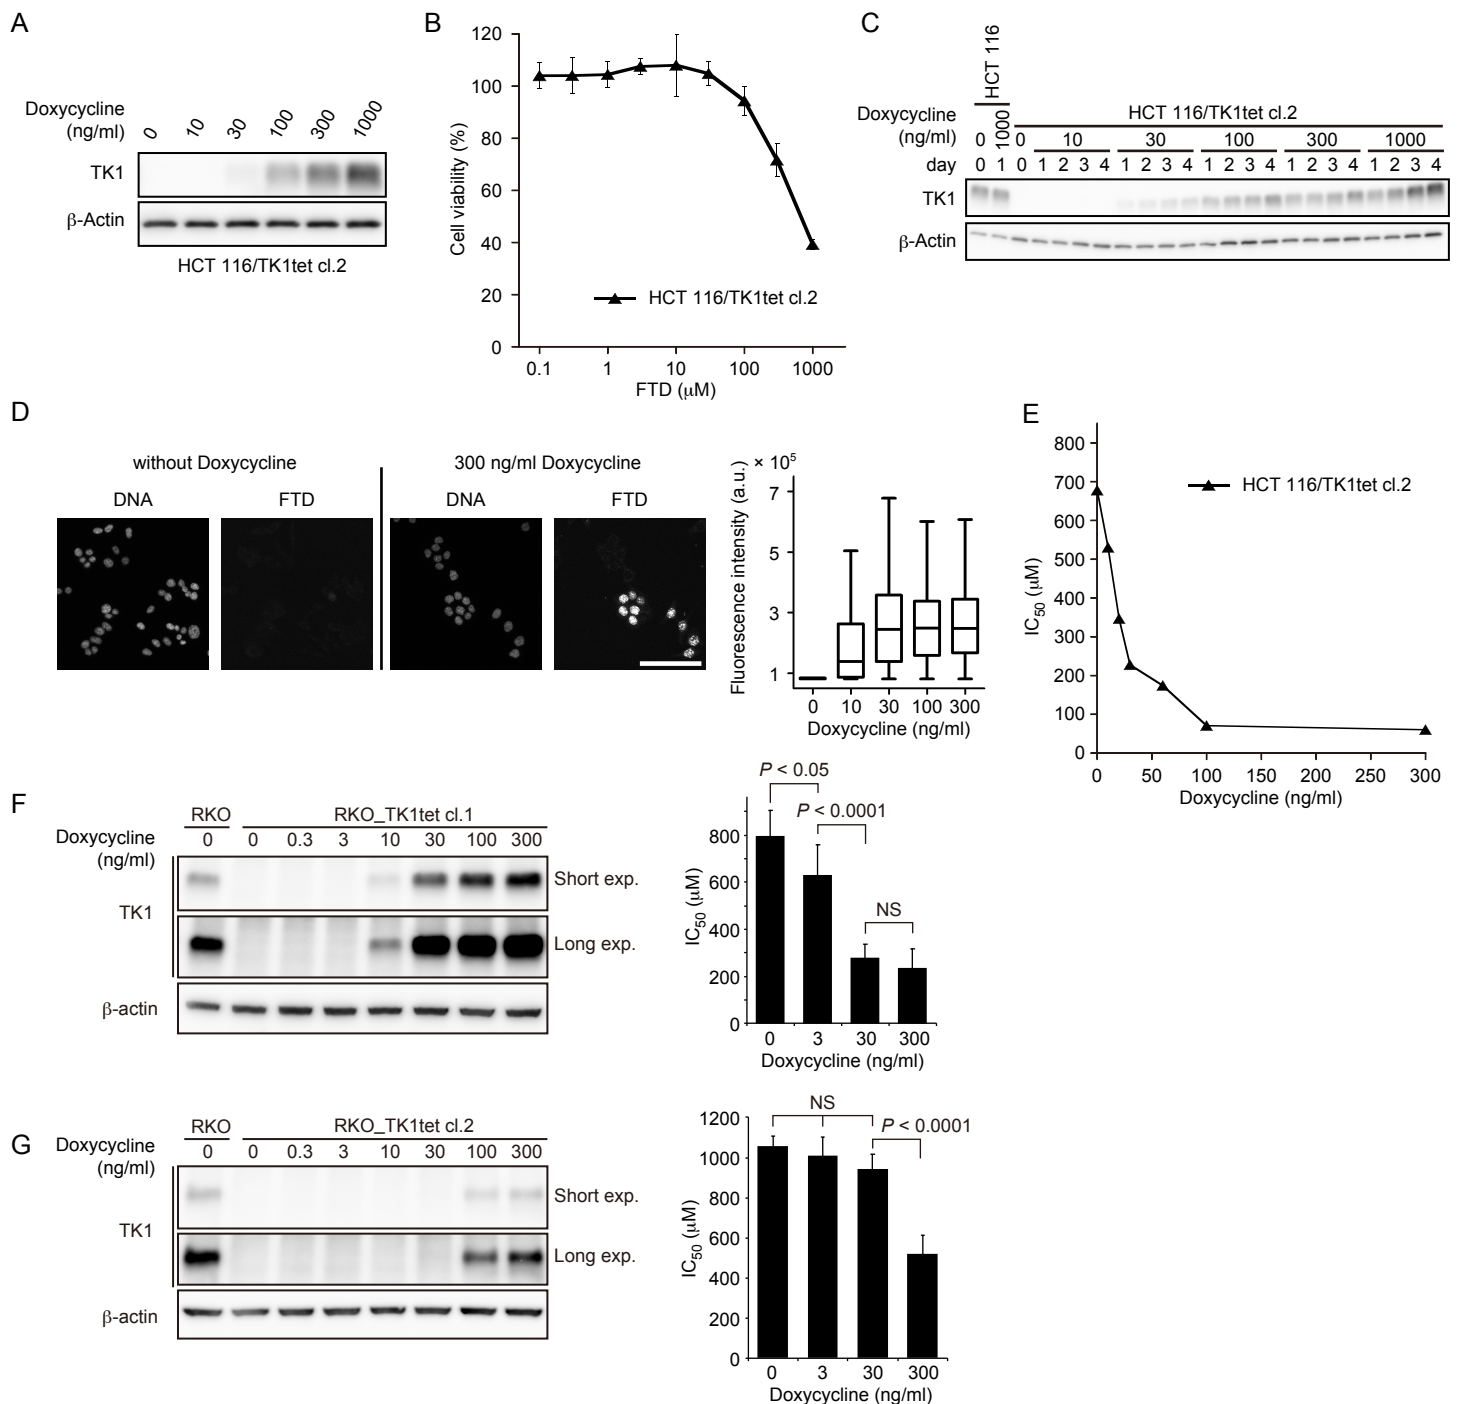

**Supplementary figure 4. Response of HCT 116/TK1tet cl. 2 and RKO/TK1tet cells to doxycycline and FTD.**

(A) Western blot analysis of TK1. HCT 116/TK1tet cl. 2 cells were treated with the indicated concentration of doxycycline for 1 day and then the level of TK1 was analysed. (B) Sensitivity of HCT 116/TK1tet cl. #2 cells to FTD. Cells were treated with the indicated concentration of FTD for 3 days and then their viability was evaluated. Relative cell viability was calculated by setting that of cells not treated with FTD to 100%. (C) Western blot analysis of TK1. Cells were treated with the indicated concentration of doxycycline for the indicated number of days. (D) Immunofluorescence images of FTD-incorporated cells (left). Cells were treated with the indicated concentration of doxycycline for 1 day and then with 6.4  $\mu$ M FTD for 1 h, fixed and immunostained with an anti-BrdU antibody. Fluorescence intensities of FTD incorporated into genomic DNA were quantified (right). Scale bar, 100  $\mu$ m. (E) FTD sensitivity of HCT 116/TK1tet cl. 2 cells. Cells were treated with the indicated concentration of doxycycline for 1 day and then with nine points of dilution series of FTD for 3 days. The IC<sub>50</sub> values in HCT 116/TK1tet cl. #2 cells treated with the indicated concentrations of doxycycline were calculated and plotted. (F, G) Western blot analysis of TK1(left) and FTD sensitivity (right) . RKO/TK1tet cells were treated with the indicated concentration of doxycycline for 1 day and then the level of TK1 and IC<sub>50</sub> values were analysed. Data are means  $\pm$  s.d. from six independent experiments. Two-tailed t-test, NS, not significant.

Suppl. Fig. 1A

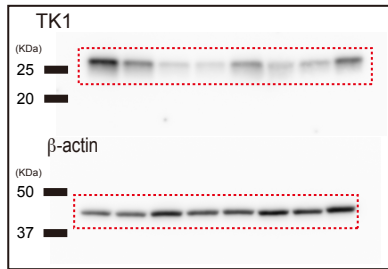

Suppl. Fig. 3A

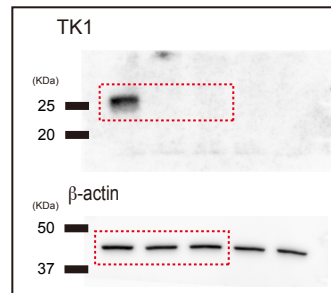

Suppl. Fig. 1B

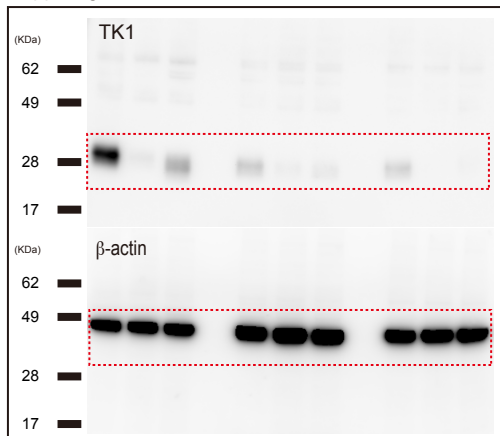

Fig. 1C

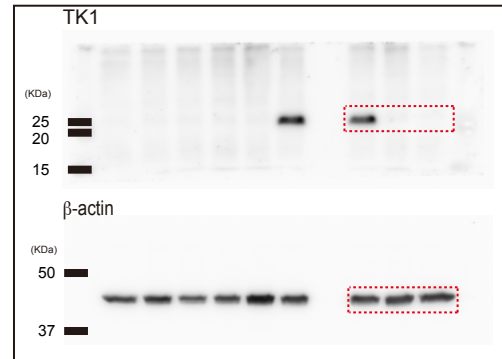

Fig. 3A

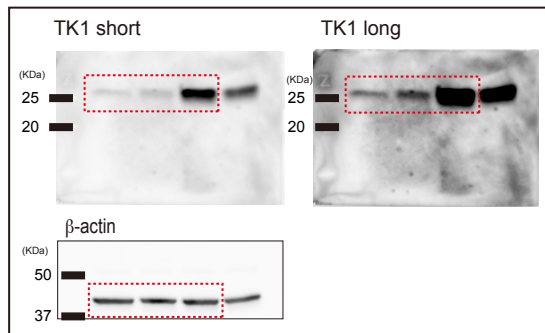

Fig. 3C and Suppl. Fig. 4A

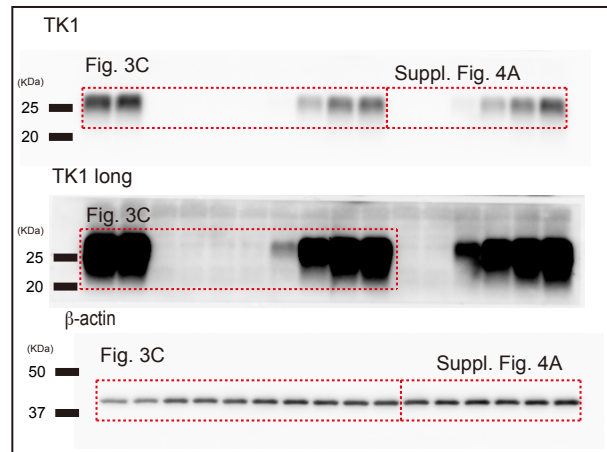

**Supplementary figure 5. Uncropped images of immunoblot. Red boxes show cropped regions.**

Fig. 3F and Suppl. Fig. 4C

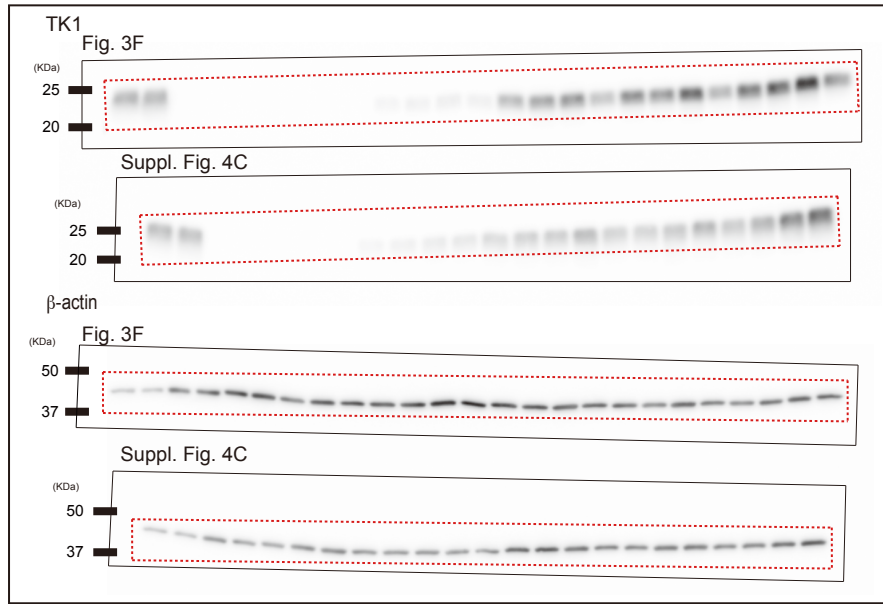

Suppl. Fig. 4F,G

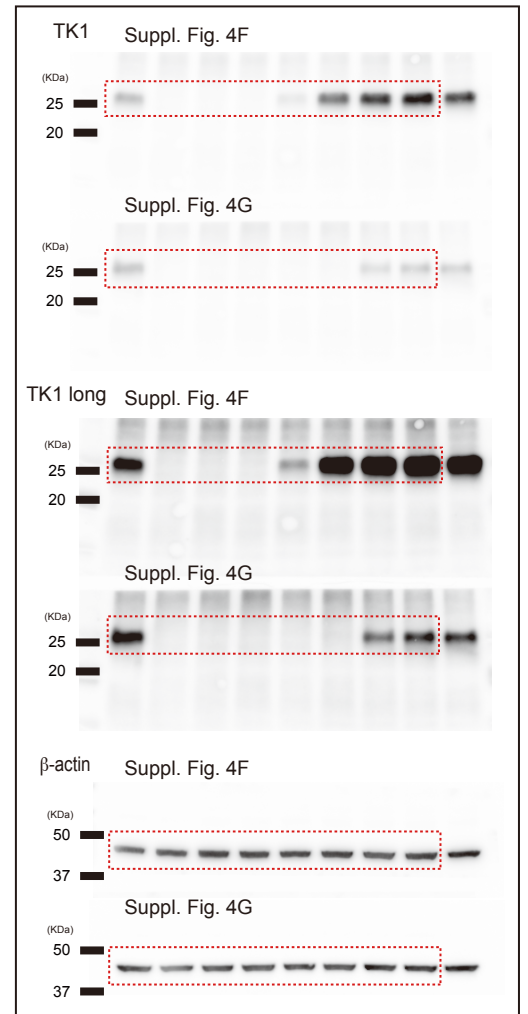

Supplementary figure 5. Continued

Supplemental Table 1. IC<sub>50</sub> value of FTD in each cell line

FTD IC<sub>50</sub> (Average ± SD, μM)

| Cell line           | Doxycycline (ng/ml) |          |          |           |          |          |           |
|---------------------|---------------------|----------|----------|-----------|----------|----------|-----------|
|                     | 0                   | 10       | 20       | 30        | 60       | 100      | 300       |
| HCT 116             | 6.4 ± 1.6           | -        | -        | -         | -        | -        | 6.0 ± 1.3 |
| HCT 116/TK1KO ex.4  | 710 ± 47            | -        | -        | -         | -        | -        | 670 ± 81  |
| HCT 116/TK1tet cl.1 | 710 ± 50            | 470 ± 30 | 390 ± 36 | 240 ± 100 | 99 ± 14  | 41 ± 4.6 | 18 ± 4.7  |
| HCT 116/TK1tet cl.2 | 680 ± 150           | 530 ± 64 | 350 ± 42 | 230 ± 53  | 170 ± 40 | 71 ± 10  | 60 ± 18   |



Supplemental Table 2. Incorporation of FTD into DNA

| Cell line      | HCT 116 |        |        | HCT 116/TK1KO ex.4 |      |      | HCT 116/TK1tet cl.9 |       |        |        |        |        | HCT 116/TK1tet cl.16 |       |        |        |        |        |
|----------------|---------|--------|--------|--------------------|------|------|---------------------|-------|--------|--------|--------|--------|----------------------|-------|--------|--------|--------|--------|
|                | 0       | 6.4    |        | 0                  | 6.4  |      | 0                   | 6.4   |        |        |        |        | 0                    | 6.4   |        |        |        |        |
| Dox (ng/ml)    | 0       | 0      | 300    | 0                  | 0    | 300  | 0                   | 0     | 10     | 30     | 100    | 300    | 0                    | 0     | 10     | 30     | 100    | 300    |
| all data       | 4262    | 5131   | 5817   | 3245               | 3995 | 3817 | 2611                | 2542  | 2414   | 2295   | 2431   | 2425   | 3432                 | 3553  | 3515   | 3462   | 3346   | 2285   |
| usable data    | 4258    | 2746   | 3239   | 3242               | 0    | 0    | 2604                | 4     | 32     | 197    | 812    | 1065   | 3411                 | 8     | 81     | 474    | 1056   | 863    |
| lower quartile | 44769   | 171743 | 179664 | 42188              | -    | -    | 44013               | 85325 | 93386  | 124525 | 163856 | 206428 | 43176                | 82053 | 87248  | 138799 | 159392 | 168398 |
| median         | 54079   | 235900 | 244067 | 51660              | -    | -    | 52835               | 85490 | 111675 | 210197 | 280886 | 303336 | 50885                | 83127 | 139099 | 245179 | 249001 | 247708 |
| upper quartile | 62630   | 293967 | 299302 | 60686              | -    | -    | 61065               | 85600 | 164557 | 317609 | 382829 | 391801 | 58651                | 83930 | 261412 | 357046 | 337297 | 344684 |
| IQR            | 17861   | 122223 | 119638 | 18498              | -    | -    | 17051               | 275   | 71171  | 193084 | 218973 | 185373 | 15476                | 1877  | 174163 | 218247 | 177905 | 176286 |
| minimum        | 19059   | 89408  | 89392  | 19775              | -    | -    | 20609               | 85075 | 86160  | 84814  | 84910  | 84867  | 20329                | 81493 | 81477  | 81431  | 81533  | 81628  |
| maximum        | 89356   | 474389 | 472941 | 87281              | -    | -    | 84808               | 85682 | 243982 | 571356 | 708414 | 639776 | 81404                | 85250 | 504021 | 677535 | 600956 | 607390 |

Supplemental Table 3. Primer, gRNA and siRNA sequences

| Primer                 | Sequence (5'-3')                            | Application                           |      |
|------------------------|---------------------------------------------|---------------------------------------|------|
| TK1_KO_exon1_sense     | CACCGAATGCAGCTCATTGCGCCTC                   | gRNA for pX330                        |      |
| TK1_KO_exon1_antisense | AAACGAGGCGCAATGAGCTGCATTC                   |                                       |      |
| TK1_KO_exon4_sense     | CACCGGCTGTCATAGGCATCGACGA                   |                                       |      |
| TK1_KO_exon4_antisense | AAACTCGTCGATGCCTATGACAGCC                   |                                       |      |
| TK1_exon1_L-arm_F      | GCAGCCCGGGGGATCCCTGGCAGGGTCTACGGATATTATTAGC | PCR to construct donor vectors        |      |
| TK1_exon1_L-arm_R      | TATACGAACGGTAGGAAGTTCACGAACCCGAGTACTCTCCAA  |                                       |      |
| TK1_exon1_R-arm_F      | TATACGAACGGTAGGAGCTGCATTAACCTGCCCACTGT      |                                       |      |
| TK1_exon1_R-arm_R      | CGCGGTGGCGGCCGCCACGGCTTCAGACTCCTTGGTTT      |                                       |      |
| TK1_exon4_L-arm_F      | GCAGCCCGGGGGATCCCAGCTCCTGAACAGTGGAAAGAGTT   |                                       |      |
| TK1_exon4_L-arm_R      | TATACGAACGGTAGGATGCCTATGACAGCCACGCCCAGG     |                                       |      |
| TK1_exon4_R-arm_F      | TATACGAACGGTAGGAGTTTGTAAAGTTGGCTTGTCTTGGCA  |                                       |      |
| TK1_exon4_R-arm_R      | CGCGGTGGCGGCCGCTGTGCGCTGCTATGACTGGCTAATTTCT |                                       |      |
| TK1_F                  | CCCTCGTAAAGAATTCACCATGAGCTGCATTAACCTGCCC    | PCR of TK1 for insertion into pTetOne |      |
| TK1_R                  | GCAGAGATCTGGATCCTCAGTTGGCAGGGCTGCATTG       |                                       |      |
| TK1_F                  | GGCAGTTTTTCCCTGACATC                        | Quantitative RT-PCR                   |      |
| TK1_R                  | CCTCGACCTCCTTCTCTGTG                        |                                       |      |
| AFMID_F                | ACTGGGAGCAGAGGAAGCCTTGA                     |                                       |      |
| AFMID_R                | GACATGCAGCAGGCTCTTCCT-3                     |                                       |      |
| $\beta$ -actin_F       | CTGGCACCACACCTTCTACAATG                     |                                       |      |
| $\beta$ -actin_R       | GGCGTACAGGGATAGCACAGC                       |                                       |      |
| TK1_siRNA              | CUCGCUACAGCAGCAGCUUdT                       |                                       | RNAi |

## Supplementary methods

The experiments of supplemental figure 1 were performed as follows.

### Cytotoxicity test

siRNA-transfected cells were seeded at densities of  $1 \times 10^3$  (HCT116 cells) or  $3 \times 10^3$  (LoVo and SW480 cells) cells/well in 96-well plates, incubated for 24 h, and then treated with FTD for 72 h. Cell numbers were determined using a simplified crystal violet staining method.

### Quantitative real-time reverse transcription polymerase chain reaction (RT-qPCR)

Cells were replated 48 hours after siRNA transfection. FTD was added at 24 hours after replating. mRNA expression was quantified at 0 and 72 hours after FTD addition. RT-qPCR was performed on a PRISM 7900HT sequence detection system using TaqMan Universal PCR Master Mix (Applied Biosystems) with the following amplification conditions: 50°C for 2 min, 95°C for 10 min, 40 cycles of 95°C for 15 s, and 60°C for 1 min. The expression level of *TK1* was normalized to those of  $\beta$ -actin (*ACTB*). The primers and TaqMan probes were prepared using Assay-on-Demand gene-expression products (Applied Biosystems). Probe ID was Hs01062123\_m1 for *TK1*. The human *ACTB* probe (VIC/MGB Probe; Applied Biosystems) was used as an endogenous control.
